# Supplementary material
Source: PubMed Central journal article supplement (PMC5029190)

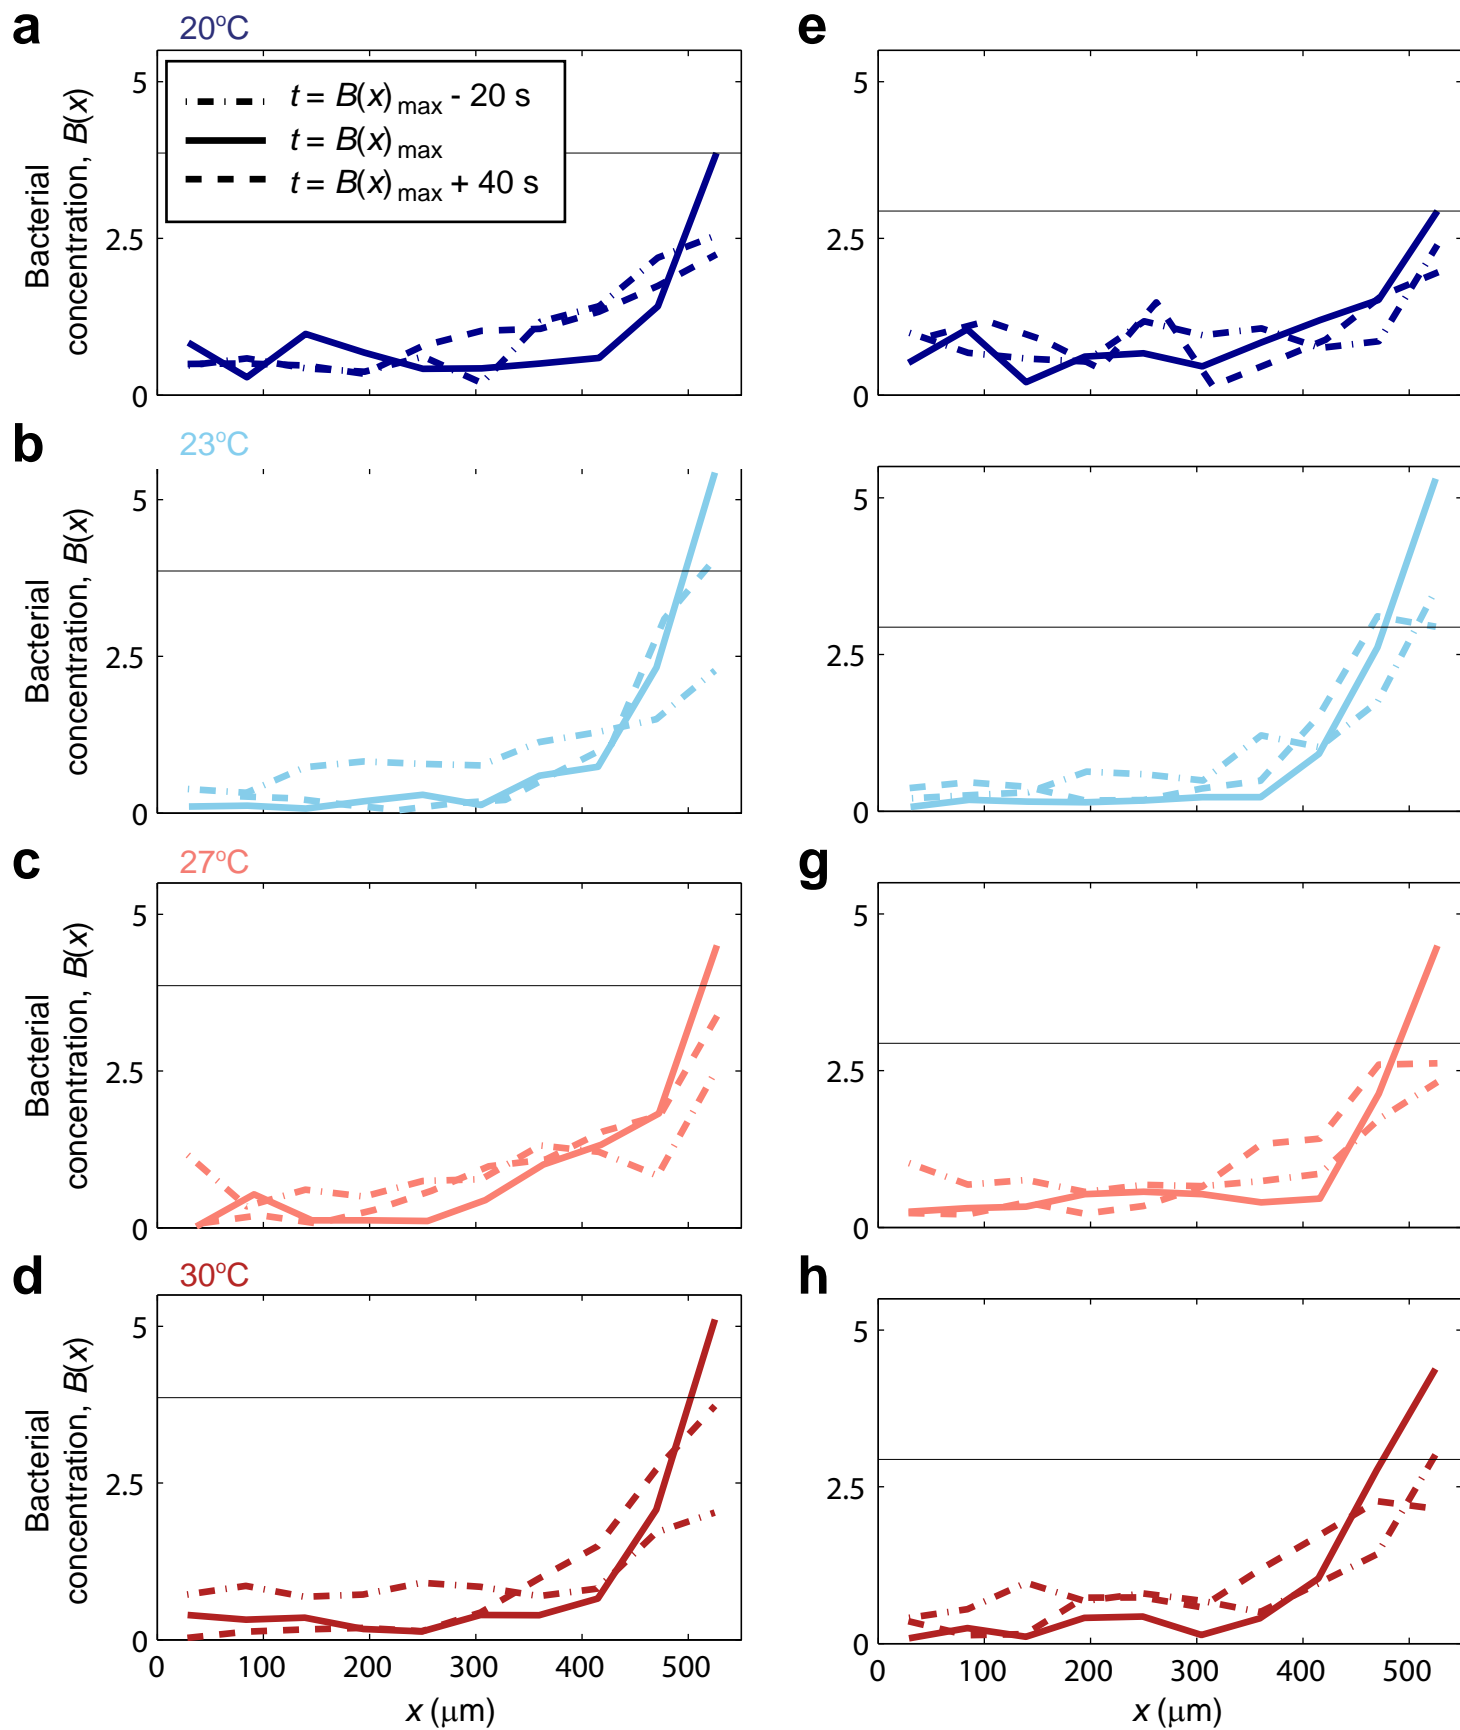

Supplement: ismej2015216x1.pdf [file ismej2015216x1.pdf]

Figure S1

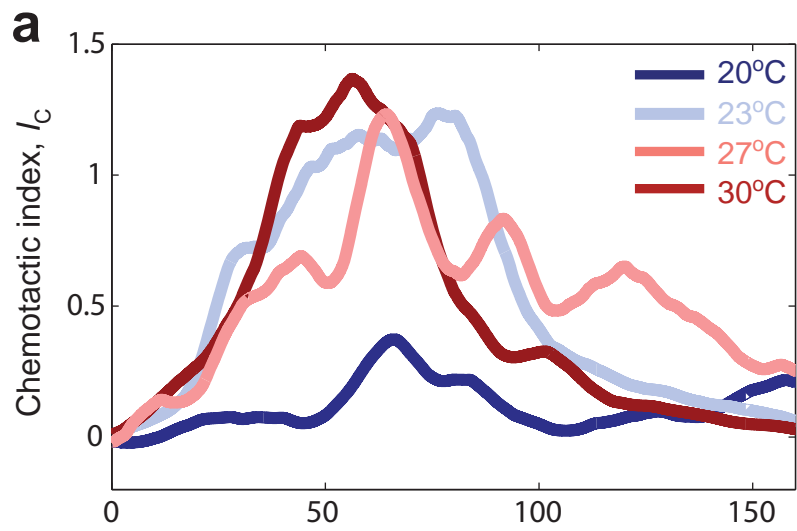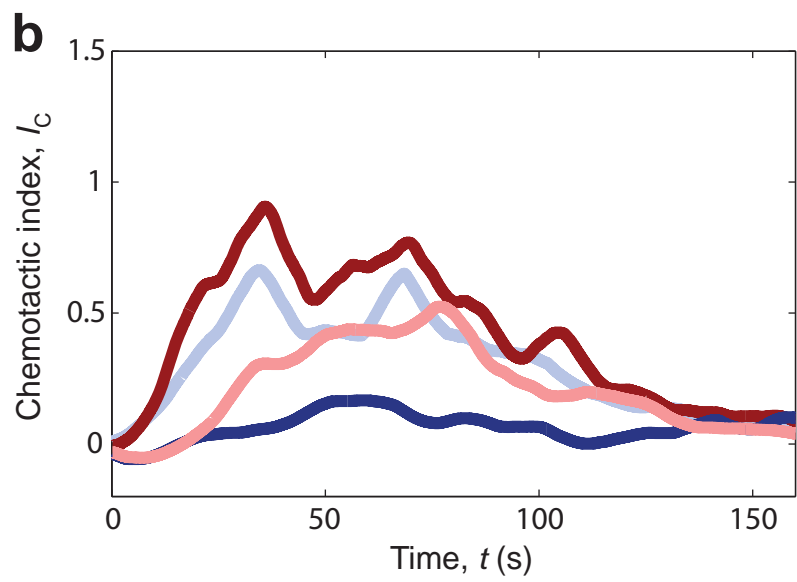

Supplement: ismej2015216x2.pdf [file ismej2015216x2.pdf]

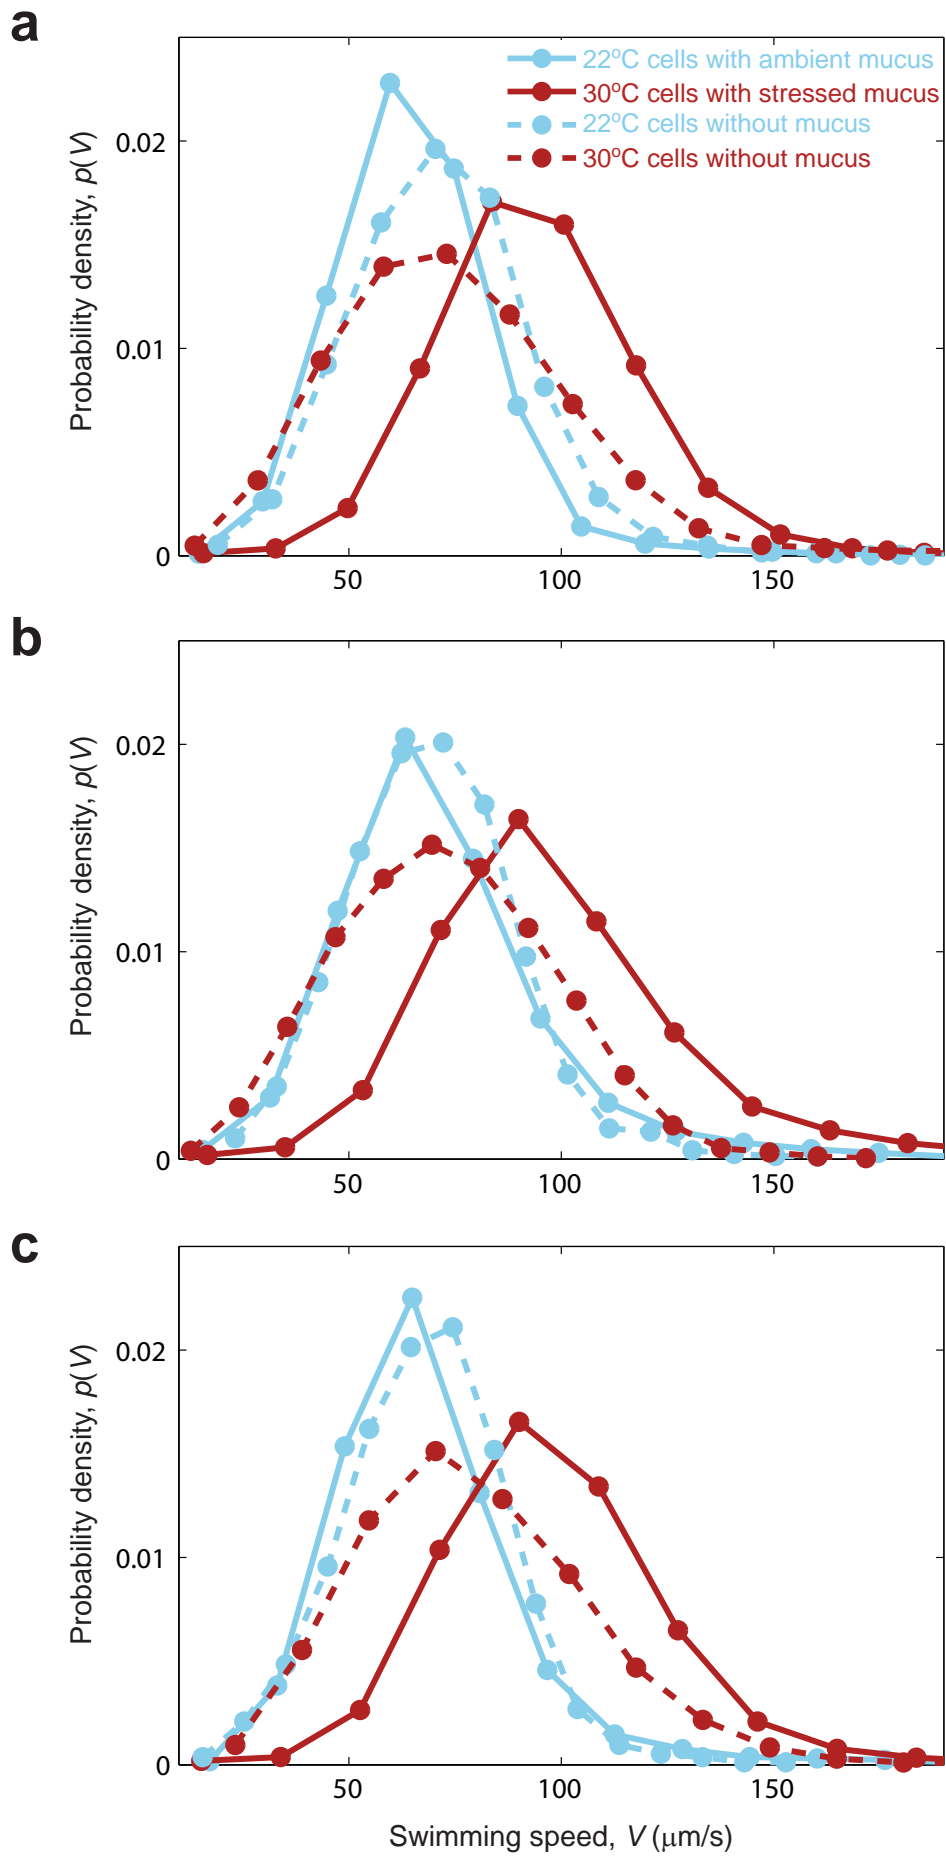

Supplement: ismej2015216x3.pdf [file ismej2015216x3.pdf]
